# Supplementary material
Source: Royal Society of Chemistry journal article supplement (doi:10.1039/d6ta03644a)
Supplement: d6ta03644a1.pdf [file d6ta03644a1.pdf]

## Supporting Information

### Charge separation manipulation in lead-free Cs<sub>3</sub>Sb<sub>2</sub>Br<sub>9</sub>/WO<sub>3</sub> heterojunction for efficient green-light-driven oxidation of benzyl alcohol and mechanistic insights

Sutsiri Wongngam<sup>a</sup>, Adilah Sirivallop<sup>a,b</sup>, Doldet Tantraviwat<sup>c</sup>, Athis Watwiangkham<sup>d,e</sup>, Siriporn Jungsuttiwong<sup>d</sup>, and Burapat Inceesungvorn<sup>a,\*</sup>

<sup>a</sup>*Department of Chemistry, Center of Excellence for Innovation in Chemistry (PERCH-CIC), and Center of Excellence in Materials Science and Technology, Faculty of Science, Chiang Mai University, Chiang Mai 50200, Thailand*

<sup>b</sup>*Office of Research Administration, Chiang Mai University, Chiang Mai 50200, Thailand*

<sup>c</sup>*Department of Electrical Engineering, Faculty of Engineering, Chiang Mai University, Chiang Mai 50200, Thailand*

<sup>d</sup>*Department of Chemistry and Center of Excellence for Innovation in Chemistry, Ubon Ratchathani University, Ubon Ratchathani, 34190, Thailand*

<sup>e</sup>*Thai Industrial Standards institute (TISI), Ministry of Industry, Bangkok 10400, Thailand*

**\*Corresponding author's email:** [burapat.i@cmu.ac.th](mailto:burapat.i@cmu.ac.th)

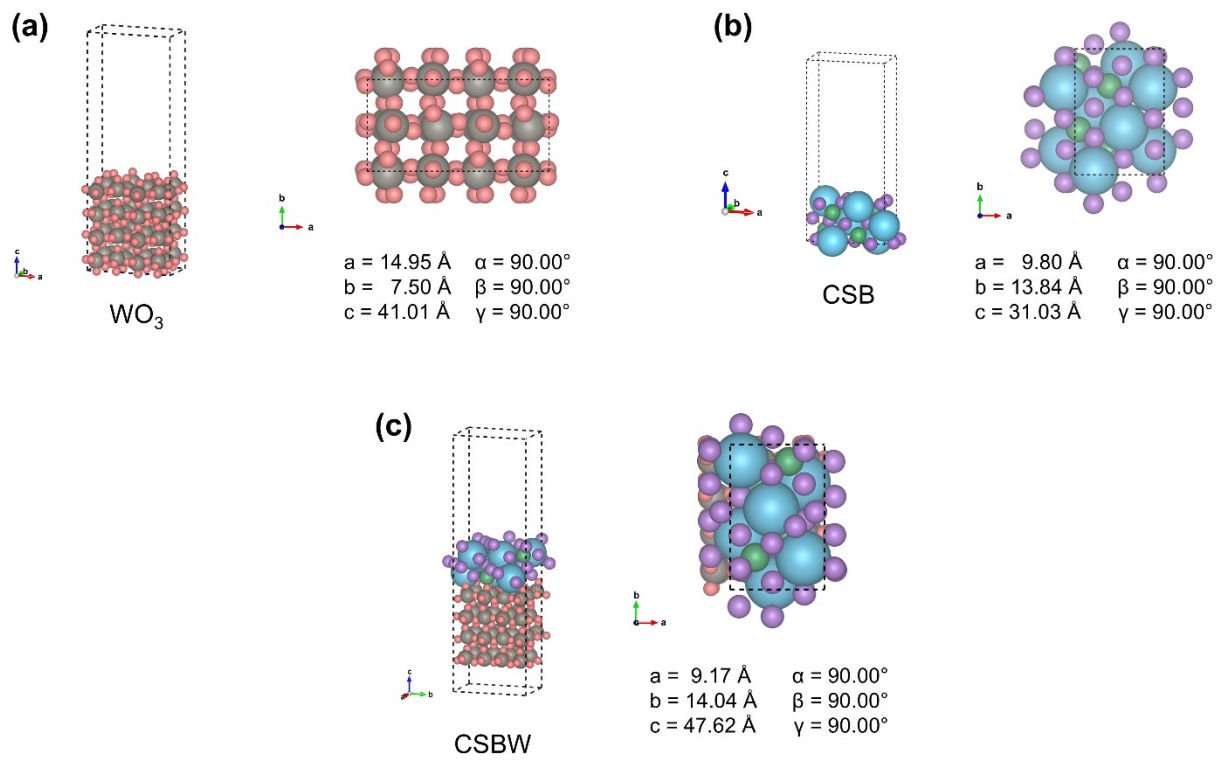

**Figure S1** Models and lattice parameters of a) WO<sub>3</sub>, b) CSB, and c) CSBW.

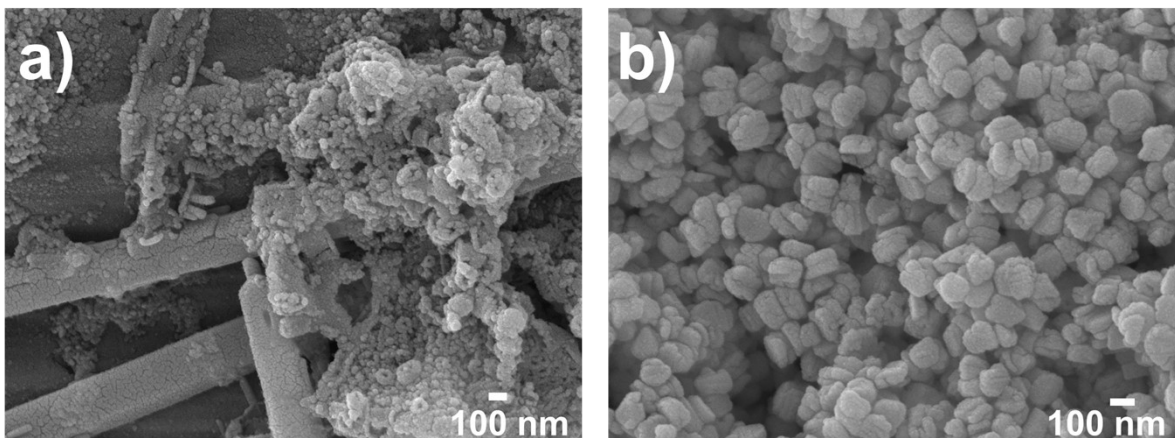

Figure S2 FESEM images of a) CSB and b)  $\text{WO}_3$ .

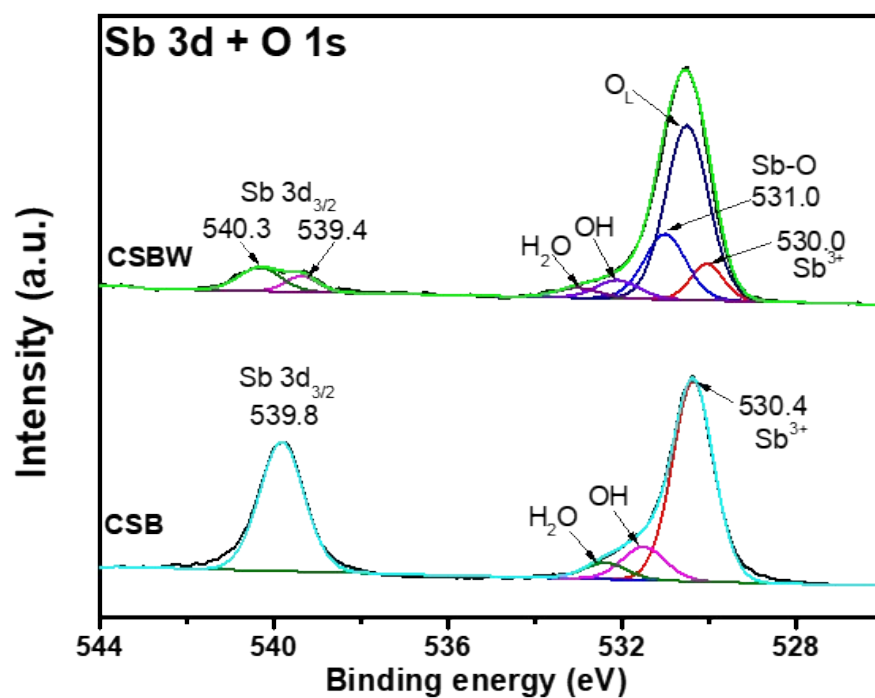

Figure S3 Sb 3d and O 1s core level spectra of pristine CSB and CSBW heterojunction.

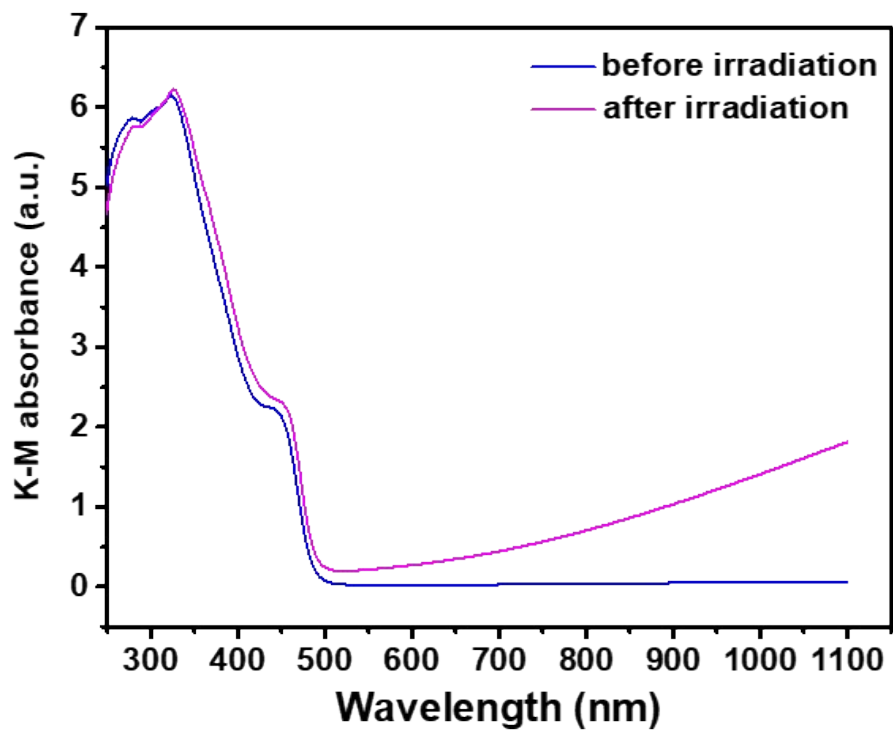

Figure S4 UV-Vis DRS spectra of CSBW before and after green LED illumination.

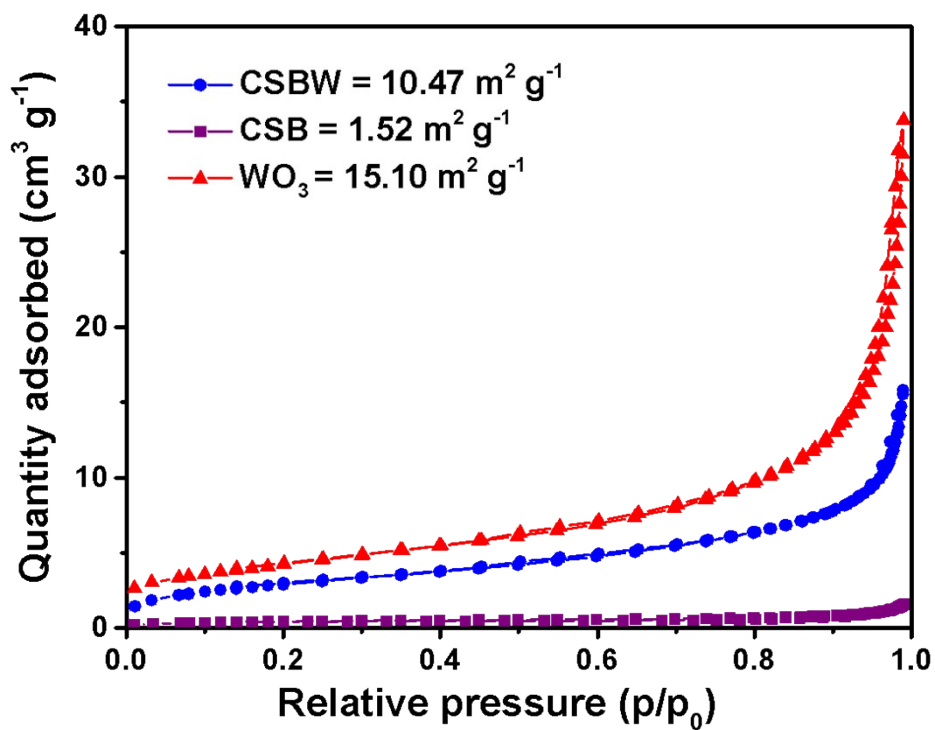

Figure S5 BET adsorption-desorption isotherms of CSB,  $\text{WO}_3$  and CSBW composite.

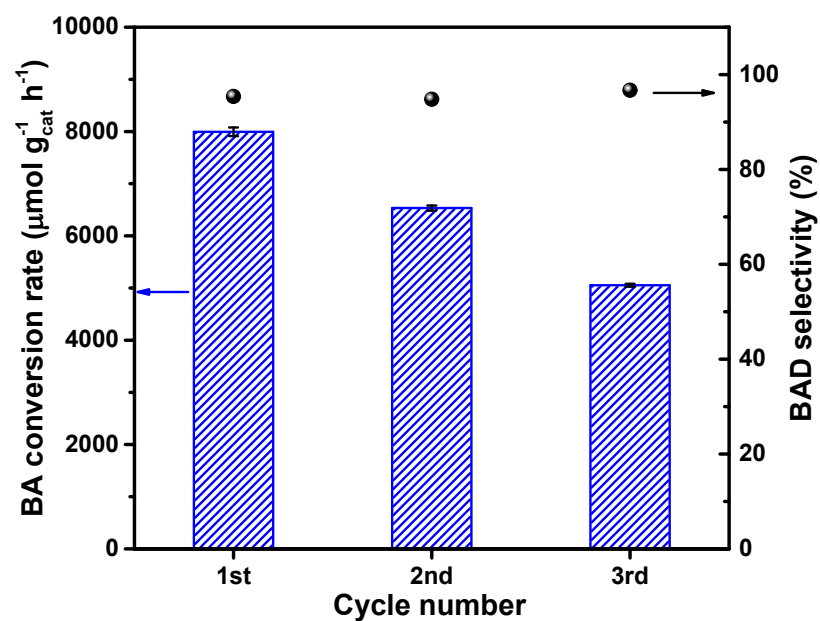

Figure S6 Recyclability of the CSBW photocatalysts.

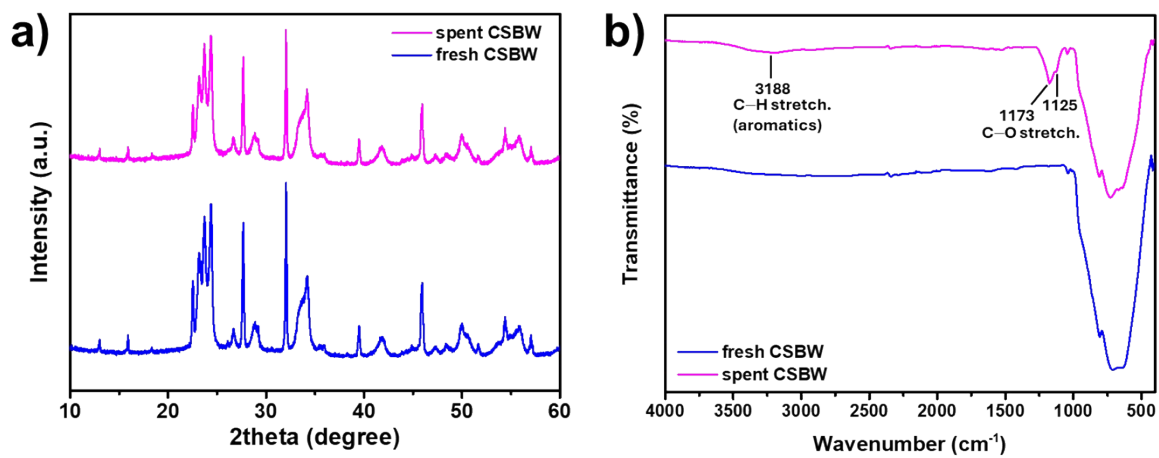

Figure S7 a) XRD patterns and b) ATR-FTIR spectra of fresh and spent CSBW samples.

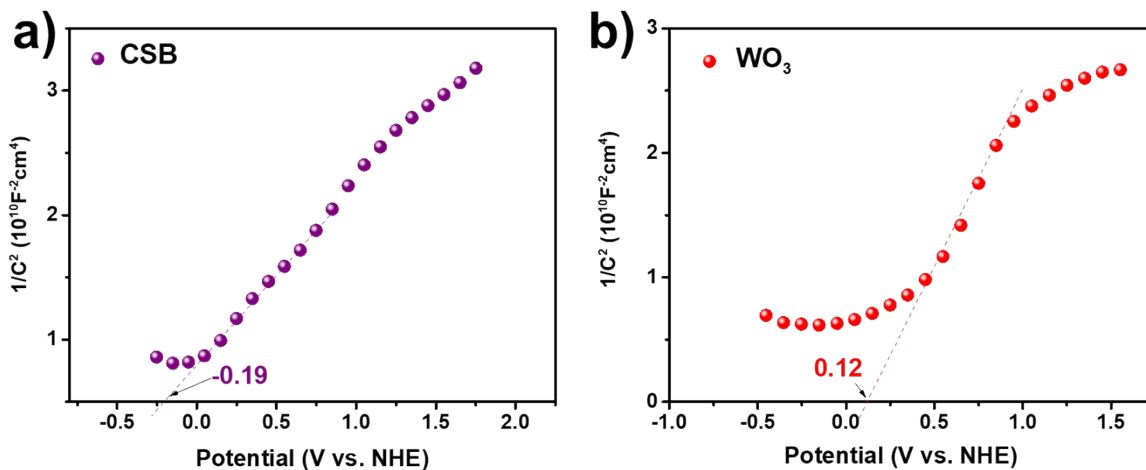

**Figure S8** Mott-Schottky plots of a) CSB and b)  $\text{WO}_3$ .

**Table S1** EIS circuit model and fitting parameters.

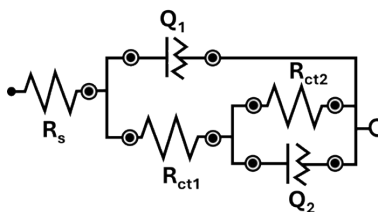

| Catalyst      | $R_s$<br>( $\Omega$ ) | $R_{ct1}$ ( $\Omega$ ) | $R_{ct2}$ ( $\Omega$ ) | $R_{ct}$ ( $\Omega$ )=<br>$R_{ct1} + R_{ct2}$ | $Q_1$ ( $\Omega^{-1}$<br>$s^N$ ) | N of<br>$Q_1$ | $Q_2$ ( $\Omega^{-1}$ $s^N$ ) | N of<br>$Q_2$ | $\chi^2$ |
|---------------|-----------------------|------------------------|------------------------|-----------------------------------------------|----------------------------------|---------------|-------------------------------|---------------|----------|
| $\text{WO}_3$ | 107                   | $20 \times 10^3$       | $119 \times 10^3$      | $139 \times 10^3$                             | $17.9 \times 10^{-6}$            | 0.863         | $925 \times 10^{-9}$          | 0             | 0.3460   |
| CSB           | 107                   | 710                    | $66.8 \times 10^3$     | $67.5 \times 10^3$                            | $2.87 \times 10^{-6}$            | 0.39          | $15.6 \times 10^{-6}$         | 0.92          | 0.0113   |
| CSBW          | 107                   | 105                    | $22 \times 10^3$       | $22.0 \times 10^3$                            | $4.27 \times 10^{-6}$            | 1.03          | $15.2 \times 10^{-6}$         | 0.837         | 0.0300   |

**Table S2** The Sb concentration from ICP-OES analysis.

| Sample     | Sb concentration<br>( $\text{mg L}^{-1}$ ) |
|------------|--------------------------------------------|
| Fresh CSBW | $0.0209 \pm 0.003$                         |
| Spent CSBW | $0.0207 \pm 0.004$                         |

### Apparent quantum yield (AQY) calculation

The AQY in the photocatalytic oxidation of benzyl alcohol (BA) was determined under green LED irradiation. The converted BA concentration was determined by using 20 mg of catalyst at 1 h irradiation, with the light intensity of 840 W m<sup>-2</sup> and an irradiated area of 4.5×10<sup>-4</sup> m<sup>2</sup>. The AQY value was calculated using the following equation:

$$AQY = \frac{N_{BA} \times N_A \times h \times c}{I \times S \times t \times \lambda} \times 100\% \quad \text{Equation S1}$$

Where  $N_{BA}$  is the converted amount of BA (mol),  $N_A$  is Avogadro's number ( $6.02 \times 10^{23} \text{ mol}^{-1}$ ),  $h$  is Plank constant ( $6.62 \times 10^{-34} \text{ J s}$ ),  $c$  represents the speed of light ( $3 \times 10^8 \text{ m s}^{-1}$ ),  $S$  is the area of irradiation ( $4.5 \times 10^{-4} \text{ m}^2$ ),  $I$  is the intensity of irradiation ( $840 \text{ W m}^{-2}$ ),  $t$  is irradiation time (3600 s), and  $\lambda$  is the wavelength of incident green light ( $530 \times 10^{-9} \text{ m}$ ).
